# Supplementary material for: Role of hypermethylated-lncRNAs in the prognosis of bladder cancer patients
Source: PubMed Central journal article supplement — J Int Med Res. 2021 Oct 7;49(10):03000605211049946. doi: 10.1177/03000605211049946 (PMC8504649; doi:10.1177/03000605211049946), 2021-10-07
Supplement: sj-pdf-1-imr-10.1177_03000605211049946.pdf [file sj-pdf-1-imr-10.1177_03000605211049946.pdf]

**ZE030121**

Date of Issue: **March 29, 2021**

## CERTIFICATION

This is to certify that a medical editor who is a native English speaker associated with MedCom Asia, Inc., has edited the manuscript entitled “**Role of Hypermethylated-lncRNAs in the Prognosis of Patients with Bladder Cancer**”

This manuscript has been sent back to the author on **March 29, 2021**. If there is any change on the manuscript by the author after the above-mentioned date, this certificate is invalid. The medical editor who edited the manuscript has been a professional editor and writer for several years and is a member of American Medical Writers Association.

### ***MedCom Asia, Inc.***

18F.-3, No. 237-1, Minquan W. Rd., Datong Dist., Taipei City 103, Taiwan  
(R.O.C.)TEL: +886-2-25578250

FAX: +886-2-25578050

E-mail: [service@medcomasia.net](mailto:service@medcomasia.net)

Web: <http://www.asiamedcom.com/eng/>
